# Supplementary material for: Microbial Activities and Dissolved Organic Matter Dynamics in Oil-Contaminated Surface Seawater from the Deepwater Horizon Oil Spill Site
Source: PubMed Central journal article supplement (PMC3324544; doi:10.1371/journal.pone.0034816), 2012-04-11
Supplement: pone.0034816.s005.pdf [file pone.0034816.s005.pdf]

## 1 **Methods S1**

2 **Enzyme activity measurements.** Hydrolysis rates of MUF- and MCA-substrates were  
3 determined by dispensing 0.5 ml of bottle water into disposable methacrylate cuvettes  
4 preloaded with a single substrate analog. Care was taken to avoid transferring oil from  
5 the 50-ml tubes that had oil contaminated seawater (SW+oil and control SW+oil), as oil  
6 residues tended to stick to the outside of the pipette tips. Therefore, we first pipetted 0.5  
7 ml of the subsamples into 1.5-ml microcentrifuge tubes; only if no visible oil was present  
8 in the latter tubes, we transferred the sample (using a clean pipette tip) into the incubation  
9 cuvettes. Samples were incubated in triplicate for two hours at 25 °C in the dark. Initial  
10 tests revealed that this incubation time was sufficient to yield significant changes in  
11 fluorescence for all of the substrates. Fluorescence was measured in samples containing  
12 1.5 ml borate buffer (50 nM; pH 8.5) using a Turner Biosystems TBS-380 fluorometer,  
13 with excitation/emission channels set to “UV” (365 nm excitation, 440-470 nm  
14 emission).

15 Oil aggregates were incubated in triplicates under the same conditions as  
16 described above, except that 0.5 ml of aggregates diluted 0.5 ml filtered and autoclaved  
17 seawater were incubated in cuvettes preloaded with a single substrate analog. This was  
18 necessary because samples were filtered through a 0.2- $\mu$ m syringe filter (final volume of  
19 the filtrate: 0.5 ml) prior to fluorescence measurements to avoid any interference caused  
20 by the presence of particulate matter. Fluorescence measurements were calibrated using  
21 MUF and MCA standards dissolved in uncontaminated and oil-contaminated water. Note  
22 that all hydrolysis rates reported here are potential rates, since they were measured with

23 an externally-added substrate that competes with naturally-occurring substrates of  
24 unknown concentration for enzyme active sites.

25 **Microbial cell abundance.** One milliliter of ambient water per time point was stained  
26 with 4', 6-diamidino-2-phenylindole (DAPI; 10% v/v) for 10 minutes and filtered  
27 through a 0.2 µm GTBP isopore filter (Millipore, Billerica, MA). Thereafter, samples  
28 were fixed in 4% paraformaldehyde (PFA in phosphate buffered saline) for 25 minutes.  
29 After washing with sterile water and PBS, filters were placed on glass microscope slides  
30 with antifade (Citifluor Ltd, UK) and stored at -20 °C until the end of the incubation. For  
31 cell enumeration in oil aggregates, one milliliter of aggregates diluted in filtered and  
32 autoclaved seawater was further diluted (1:100) and fixed with 2% PFA for 24 hours, and  
33 incubated with 0.001M sodium pyrophosphate for 15 minutes (Na<sub>4</sub>P<sub>2</sub>O<sub>7</sub>; 1:200 dilution).  
34 Samples were sonicated (6 x 5-s bursts at 30 Watts) with a Sonic Dismembrator 60  
35 (Fisher Scientific), stained with DAPI, and stored in the dark at -20 °C. For microscopic  
36 cell enumeration, duplicate filters per sample were examined under an epifluorescence  
37 microscope (Olympus, magnification x1000) equipped with a digital camera (Olympus  
38 TH4-100), and cells from ten randomly chosen frames were counted.

39 **CDOM.** A 1 cm quartz cuvette was used for all samples and measured absorbance (A)  
40 was converted to absorption coefficients (*a*) using Equation 1.

41 
$$a_{(\lambda)} = 2.303A_{(\lambda)} / L \quad (1)$$

42 *L* is the pathlength in meters (0.01 m). CDOM excitation-emission matrix (EEM)  
43 fluorescence was measured immediately following absorption measurements on a Varian  
44 Eclipse spectrofluorometer. Excitation wavelengths ranged from 220 to 500 nm at 5 nm  
45 increments, while emission wavelengths were sampled every 2 nm from 240 to 600 nm.

46 EEM fluorescence intensities were corrected for Rayleigh and Raman scattering, Milli-Q  
47 water blank-subtracted, and instrument bias in excitation and emission prior to correction  
48 for any inner-filtering effect [1]. Appropriate corrections for samples that were diluted  
49 were performed prior to a final calibration of fluorescence in each EEM to quinine sulfate  
50 equivalents (ppb QSE; [2]).

51

## 52 **References**

- 53 1. Stedmon CA, Bro R. (2008) Characterizing dissolved organic matter fluorescence  
54 with parallel factor analysis: A tutorial. *Limnol Oceanogr: Methods* 6: 572-579.
- 55 2. Lawaetz AJ, Stedmon CA. (2009) Fluorescence intensity calibration using the raman  
56 scatter peak of water. *Appl Spectrosc* 63(8): 936-940.

57
